# Supplementary material
Source: publisher figshare collection journal article supplement (https://acs.figshare.com/ndownloader/files/4509421)
Supplement: Supplementary file 1 [file 4509421]

data_rja11 
_audit_creation_date        04-20-09
_audit_creation_method CRYSTALS_ver_12-03-99
#  9171657    rja11                                            
_audit_update_record                   
;
2004-09-20 - Report on C42 H38 Cl2 N4 P2 Ru 
             by Anthony C. Willis
             for   Anthony F. Hill and Robyn Abernethy

2004-09-20 - passes checkcif tests with minor warnings

;
#                                                                               
# 1. SUBMISSION DETAILS                                                         
_publ_requested_journal               ' test '
_publ_requested_category              'FM '
_publ_contact_author_name             ' Anthony C. Willis '

_publ_contact_author_address
;
Research School of Chemistry,
Australian National University,
Canberra, A. C. T. 0200, Australia
;
_publ_contact_letter
;
    ENTER TEXT OF LETTER
;

_publ_requested_coeditor_name          ?
_publ_contact_author_phone            ' 61 2 6125 4109 '
_publ_contact_author_fax              ' 61 2 6125 0750 '
_publ_contact_author_email            ' willis@rsc.anu.edu.au '
                                                                                
#=============================================================================  
# 2. PROCESSING SUMMARY (IUCr Office Use Only)                                  
_journal_date_recd_electronic     ?                                             
_journal_date_to_coeditor         ?                                             
_journal_date_from_coeditor       ?                                             
_journal_date_accepted            ?                                             
_journal_date_printers_first      ?                                             
_journal_date_printers_final      ?                                             
_journal_date_proofs_out          ?                                             
_journal_date_proofs_in           ?                                             
_journal_coeditor_name            ?                                             
_journal_coeditor_code            ?                                             
_journal_coeditor_notes                                                         
;                                                                               
                                  ?                                             
;                                                                               
_journal_techeditor_code          ?                                             
_journal_techeditor_notes                                                       
;                                                                               
                                  ?                                             
;                                                                               
_journal_coden_ASTM               ?                                             
_journal_name_full                ?                                             
_journal_year                     ?                                             
_journal_volume                   ?                                             
_journal_issue                    ?                                             
_journal_page_first               ?                                             
_journal_page_last                ?                                             
_journal_suppl_publ_number        ?                                             
_journal_suppl_publ_pages         ?                                             
#=============================================================================  
# 3. TITLE AND AUTHOR LIST                                                      
_publ_section_title                                                             
;                                                                               
[Ru(C~3~H~4~N~2~)~2~{P(C~6~H~5~)~3~}~2~Cl~2~] 
---  rja11             
;                                                                               
# The loop structure below should contain the names and addresses of all        
# authors, in the required order of publication. Repeat as necessary.           
loop_
_publ_author_name
_publ_author_address
'  Anthony C. Willis '
;
Research School of Chemistry,
Australian National University,
Canberra, A. C. T. 0200, Australia
;
'  Robyn J. Abernethy '
;
Research School of Chemistry,
Australian National University,
Canberra, A. C. T. 0200, Australia
;
'  Anthony F. Hill '
;
Research School of Chemistry,
Australian National University,
Canberra, A. C. T. 0200, Australia
;
#============================================================================== 
# 4. TEXT                                                                       
_publ_section_abstract  #Text of the abstract                                   
;                                                                               
The crystal structure of 
[Ru(C~3~H~4~N~2~)~2~{P(C~6~H~5~)~3~}~2~Cl~2~] is reported.
;                                                                               
_publ_section_comment  #Text of the paper                                       
;                                                                               

The  crystallographic unit cell contains one  molecule of
[Ru(C~3~H~4~N~2~)~2~{P(C~6~H~5~)~3~}~2~Cl~2~] 
centred on a crystallographic inversion centre.

The second N of the pyrazole group was determined to be at
atom site 2 rather than at site 5 by comparative refinement. 
If the assignment of atom-types is reversed
the displacement parameters are less similar 
(U~eq~ 0.0268 and 0.0495 for C(2) and N(5) respectively
cf. 0.0387 and 0.0345 for N(2) and C(5))
and the agreement factors are worse (R = 0.0306 cf. 0.0273).
Interatomic distances and angles also favour the
present assignment.


The final difference electron density map was generally featureless
with the biggest features close to the Ru atom.


;                                                                               
_publ_section_acknowledgements  # Acknowledgments                               
;                                                                               
?                                                                               
;                                                                               
_publ_section_figure_captions  #Captions to figures                             
;                                                                               
?                                                                               
;                                                                               
_publ_section_exptl_refinement                                                  
# see also _refine_ls_hydrogen for refinement keywords.                         
;                                                                               
H atoms  were included at idealized positions
and, during refinement, ride on the atom to which they are attached.
;                                                                               
_publ_section_exptl_prep                                                        
;                                                                               
    The compound was prepared by RJA and 
recrystallized  from dichloromethane/methanol.
The sample ID was RA1,067.
;                                                                               
 
 
#========================================================================== 
 
_chemical_name_systematic         # IUPAC name, in full 
; 
? 
; 
 
_chemical_melting_point           ? 
 
# choose from 'full, fullcycle, atomblock, userblock, diagonal, sparse' 
_refine_ls_matrix_type            full 
 
# choose from 'heavy, direct, difmap, geom' 
_atom_sites_solution_primary      direct 
 
# _atom_sites_solution_secondary difmap 
_atom_sites_solution_hydrogens    geom 
 
# choose from 'none, undef, noref, refall, refxyz, refU, constr, mixed' 
_refine_ls_hydrogen_treatment     noref 
 
#**************************************************************************** 
# General computing 
#============================================================= 
_computing_structure_refinement 
; 
 CRYSTALS (Watkin et al 2003) 
; 
_computing_publication_material 
; 
 CRYSTALS (Watkin et al 2003) 
; 
_computing_molecular_graphics 
; 
ORTEP-II (Johnson 1976) in teXsan (MSC, 1992-1997)
; 
#============================================================= 
 
_cell_length_a                    9.0141(3)
_cell_angle_alpha                 113.1149(15)
_cell_length_b                    9.6443(2)
_cell_angle_beta                  95.1954(14)
_cell_length_c                    11.9277(3)
_cell_angle_gamma                 100.4037(16)
_cell_volume                      922.95(4)
 
_symmetry_cell_setting            'Triclinic' 
_symmetry_space_group_name_H-M    'P -1 ' 
loop_
 _symmetry_equiv_pos_as_xyz
 'x,y,z'
 '-x,-y,-z'
 
# choose from: rm (reference molecule of 
# known chirality), ad (anomolous 
# dispersion - ie. Flack param), rmad 
# (both rm and ad), syn (known from 
# synthetic pathway), unk (unknown) 
# or . (not applicable). 
 
_chemical_absolute_configuration  '.' 
 
loop_
_atom_type_symbol
_atom_type_scat_dispersion_real
_atom_type_scat_dispersion_imag
_atom_type_scat_Cromer_Mann_a1
_atom_type_scat_Cromer_Mann_b1
_atom_type_scat_Cromer_Mann_a2
_atom_type_scat_Cromer_Mann_b2
_atom_type_scat_Cromer_Mann_a3
_atom_type_scat_Cromer_Mann_b3
_atom_type_scat_Cromer_Mann_a4
_atom_type_scat_Cromer_Mann_b4
_atom_type_scat_Cromer_Mann_c
_atom_type_scat_source  
 'C   '    0.0033    0.0016    2.3100   20.8439
    1.0200   10.2075    1.5886    0.5687    0.8650   51.6512    0.2156
'International_Tables_Vol_IV_Table_2.2B'
 'H   '    0.0000    0.0000    0.4930   10.5109
    0.3229   26.1257    0.1402    3.1424    0.0408   57.7998    0.0030
'International_Tables_Vol_IV_Table_2.2B'
 'Cl  '    0.1484    0.1585   11.4604    0.0104
    7.1964    1.1662    6.2556   18.5194    1.6455   47.7784   -9.5574
'International_Tables_Vol_IV_Table_2.2B'
 'N   '    0.0061    0.0033   12.2126    0.0057
    3.1322    9.8933    2.0125   28.9975    1.1663    0.5826  -11.5290
'International_Tables_Vol_IV_Table_2.2B'
 'P   '    0.1023    0.0942    6.4345    1.9067
    4.1791   27.1570    1.7800    0.5260    1.4908   68.1645    1.1149
'International_Tables_Vol_IV_Table_2.2B'
 'Ru  '   -1.2594    0.8363   19.2674    0.8085
   12.9182    8.4347    4.8634   24.7997    1.5676   94.2928    5.3787
'International_Tables_Vol_IV_Table_2.2B'
 
 
_cell_formula_units_Z                    1
_chemical_formula_sum             ' C42 H38 Cl2 N4 P2 Ru '
_chemical_formula_moiety          ' C42 H38 Cl2 N4 P2 Ru '
_chemical_compound_source
;
?
;
_chemical_formula_weight            832.71
 
 
_cell_measurement_reflns_used        16802
_cell_measurement_theta_min              3
_cell_measurement_theta_max             27
_cell_measurement_temperature          200
 
_exptl_crystal_description        ' block ' 
_exptl_crystal_colour             ' yellow ' 
_exptl_crystal_size_min           0.15 
_exptl_crystal_size_mid           0.15 
_exptl_crystal_size_max           0.15 
 
_exptl_crystal_density_diffrn     1.498 
_exptl_crystal_density_meas 'not measured' 
# Non-dispersive F(000): 
_exptl_crystal_F_000              426 
_exptl_absorpt_coefficient_mu     0.694 
 
_diffrn_measurement_device_type 
; 
Nonius Kappa CCD 
; 
_diffrn_radiation_monochromator   graphite 
_computing_data_collection 
; 
 COLLECT (Nonius BV, 1997) 
; 
_computing_data_reduction 
; 
 Denzo/Scalepack (Otwinowski & Minor, 1996) 
; 
_computing_cell_refinement 
; 
 Denzo/Scalepack (Otwinowski & Minor, 1996) 
; 
_computing_structure_solution 
; 
 SIR92 (Altomare et al, 1994) 
; 
 
_diffrn_measurement_method ' \f and \w scans with CCD ' 
_diffrn_special_details
;
CCD data collecting conditions-
phi and omega scans of width 2.0 deg at rate 50 sec/frame,
crystal-detector distance 32mm,
multiple scan sets so over 95 percent of data collected with 2-fold  
redundancy or more.
;
 
# Absorption correction 

loop_
_exptl_crystal_face_index_h 
_exptl_crystal_face_index_k 
_exptl_crystal_face_index_l 
_exptl_crystal_face_perp_dist 
   -1    0    0  0.090
    0    0    1  0.040
    0    0   -1  0.070
    0    4   -3  0.072
    0   -1    1  0.070
    2    0   -2  0.058
    4    0    2  0.020


_exptl_absorpt_correction_type 'integration' 
_exptl_absorpt_correction_T_min  0.906
_exptl_absorpt_correction_T_max  0.942
_exptl_absorpt_process_details
;
via Gaussian method (Coppens, 1970) implemented in maXus (2000)
;
#_diffrn_reflns_av_R_equivalents   0.049
# Sheldrick geometric definitions 0.90 0.90 
 
 
_diffrn_standards_interval_time   0 
_diffrn_standards_interval_count  0 
_diffrn_standards_number          0 
_diffrn_standards_decay_%         0.00 
 
_diffrn_ambient_temperature        200
_diffrn_reflns_number             20968 
_reflns_number_total              4248 
_diffrn_reflns_av_R_equivalents   0.05 
# Number of reflections with Friedels Law is 4248 
# Number of reflections without Friedels Law is 0 
# Theoretical number of reflections is about 4241 
 
 
_diffrn_reflns_theta_min          2.728 
_diffrn_reflns_theta_max          27.501 
_diffrn_measured_fraction_theta_max 0.998 
 
_diffrn_reflns_theta_full         27.501 
_diffrn_measured_fraction_theta_full 0.998 
 
 
_diffrn_reflns_limit_h_min        -11 
_diffrn_reflns_limit_h_max        11 
_diffrn_reflns_limit_k_min        -12 
_diffrn_reflns_limit_k_max        11 
_diffrn_reflns_limit_l_min        -15 
_diffrn_reflns_limit_l_max        15 
_reflns_limit_h_min               -11 
_reflns_limit_h_max               11 
_reflns_limit_k_min               -12 
_reflns_limit_k_max               11 
_reflns_limit_l_min               0 
_reflns_limit_l_max               15 
 
 
_refine_diff_density_min          -0.74 
_refine_diff_density_max          0.37 
 
 
_refine_ls_number_reflns          3228 
_refine_ls_number_restraints      0 
_refine_ls_number_parameters      232 
 
#_refine_ls_R_factor_ref 0.0270 
_refine_ls_wR_factor_ref          0.0307 
_refine_ls_goodness_of_fit_ref    1.1090 
 
#_reflns_number_all 3626 
_refine_ls_R_factor_all           0.0313 
_refine_ls_wR_factor_all          0.0333 
 
# The I/u(I) cutoff below was used for refinement as 
# well as the _gt R-factors:
_reflns_threshold_expression      I>3.00u(I)
_reflns_number_gt                 3228 
_refine_ls_R_factor_gt            0.0270 
_refine_ls_wR_factor_gt           0.0307 
 
 
_refine_ls_shift/su_max           0.000361 
_refine_ls_structure_factor_coef  F 
_refine_ls_weighting_scheme       calc 
_refine_ls_weighting_details 
;
 Method, part 1, Chebychev polynomial, (Watkin, 1994, Prince, 1982) 
 [weight] = 1.0/[A~0~*T~0~(x)+A~1~*T~1~(x) ... +A~n-1~]*T~n-1~(x)] 
 where A~i~ are the Chebychev coefficients listed below and x= Fcalc/Fmax 
 Method = Robust Weighting (Prince, 1982) 
 W = [weight] * [1-(deltaF/6*sigmaF)^2^]^2^ 
 A~i~ are: 
 0.392 0.118 0.169 
;
_diffrn_radiation_type            'Mo K\a'
_diffrn_radiation_wavelength           0.71073
 
 
## -------------------REFERENCES ----------------------## 
## Insert your own references - in alphabetic order 
_publ_section_references 
; 

Mackay, S., Gilmore, C. J.,Edwards, C., Stewart, N. & Shankland, K.
(2000). maXus  Computer Program for the Solution and Refinement of
Crystal Structures. Nonius, The Netherlands, MacScience, Japan & The
University of Glasgow.

Coppens, P. (1970).  The Evaluation of Absorption and Extinction in
Single-Crystal Structure Analysis.  Crystallographic Computing.  F. R. Ahmed,
S. R. Hall and C. P. Huber, eds., Munksgaard. Copenhagen. pp 255-270.
 
 
Altomare, A., Cascarano, G., Giacovazzo G., Guagliardi A., Burla M.C., 
Polidori, G. & Camalli, M. (1994) SIR92 - a program for automatic solution 
of crystal structures by direct methods. J. Appl. Cryst. (27), 435-435 
 
 
Betteridge, P.W., Carruthers, J.R., Cooper, R.I., 
Prout, K., Watkin, D.J. (2003). J. Appl. Cryst. 36, 1487. 
 
 
Nonius BV, COLLECT Software, 1997-2001) 
 
 
Otwinowski, Z. & Minor, W. (1996), Processing of X-ray 
Diffraction Data Collected in Oscillation Mode. Methods Enzymol. 
276, 1997, 307-326. Ed Carter, C.W. & Sweet, R.M., Academic Press. 
 
 
Prince, E. 
Mathematical Techniques in Crystallography 
and Materials Science 
Springer-Verlag, New York, 1982. 
 
 
Watkin D.J. (1994), 
Acta Cryst, A50, 411-437 
 
 
Molecular Structure Corporation. (1992-1997). teXsan. 
Single Crystal Structure Analysis Software. Version 1.8.
MSC, 3200 Research Forest Drive, The Woodlands, TX 77381, USA.

Johnson, C.K. (1976)
ORTEP-II, A Fortran Thermal-Ellipsoid Plot Program, Report ORNL-5138, 
Oak Ridge National Laboratory, Oak Ridge, Tennessee, USA.
; 

# Uequiv = arithmetic mean of Ui
# i.e. Ueqiv = (U1+U2+U3)/3

# Replace trailing . with the number of unfound
# hydrogen atoms attaced to relavent atom

loop_
_atom_site_label
_atom_site_type_symbol
_atom_site_fract_x
_atom_site_fract_y
_atom_site_fract_z
_atom_site_U_iso_or_equiv
_atom_site_occupancy
_atom_site_adp_type
_atom_site_refinement_flags_posn
_atom_site_refinement_flags_adp
_atom_site_refinement_flags_occupancy
_atom_site_disorder_assembly
_atom_site_disorder_group
_atom_site_attached_hydrogens
Ru1 Ru 0.5000 0.5000 0.5000 0.0222 1.0000 Uani S . . . . . 
Cl1 Cl 0.69585(6) 0.38274(6) 0.55461(5) 0.0296 1.0000 Uani . . . . . . 
P1 P 0.50851(6) 0.69107(6) 0.70828(5) 0.0223 1.0000 Uani . . . . . . 
N1 N 0.3300(2) 0.3509(2) 0.53350(16) 0.0271 1.0000 Uani . . . . . . 
N2 N 0.1808(2) 0.3216(3) 0.48659(19) 0.0386 1.0000 Uani . . . . . . 
C3 C 0.0927(4) 0.2242(4) 0.5236(3) 0.0534 1.0000 Uani . . . . . . 
C4 C 0.1886(4) 0.1875(3) 0.5957(3) 0.0515 1.0000 Uani . . . . . . 
C5 C 0.3376(3) 0.2689(3) 0.6011(2) 0.0350 1.0000 Uani . . . . . . 
C11 C 0.5721(2) 0.6661(2) 0.84955(19) 0.0253 1.0000 Uani . . . . . . 
C12 C 0.6867(3) 0.5884(3) 0.8520(2) 0.0340 1.0000 Uani . . . . . . 
C13 C 0.7434(3) 0.5790(3) 0.9608(2) 0.0432 1.0000 Uani . . . . . . 
C14 C 0.6848(3) 0.6451(3) 1.0667(2) 0.0411 1.0000 Uani . . . . . . 
C15 C 0.5700(3) 0.7212(3) 1.0653(2) 0.0388 1.0000 Uani . . . . . . 
C16 C 0.5144(3) 0.7334(3) 0.9581(2) 0.0345 1.0000 Uani . . . . . . 
C21 C 0.6246(2) 0.8857(2) 0.7440(2) 0.0261 1.0000 Uani . . . . . . 
C22 C 0.6038(3) 0.9484(3) 0.6572(2) 0.0317 1.0000 Uani . . . . . . 
C23 C 0.6941(3) 1.0908(3) 0.6757(3) 0.0412 1.0000 Uani . . . . . . 
C24 C 0.8057(3) 1.1728(3) 0.7810(3) 0.0456 1.0000 Uani . . . . . . 
C25 C 0.8243(3) 1.1157(3) 0.8689(3) 0.0418 1.0000 Uani . . . . . . 
C26 C 0.7340(3) 0.9728(3) 0.8513(2) 0.0317 1.0000 Uani . . . . . . 
C31 C 0.3199(2) 0.7284(3) 0.73865(19) 0.0268 1.0000 Uani . . . . . . 
C32 C 0.2107(3) 0.6099(3) 0.7442(2) 0.0317 1.0000 Uani . . . . . . 
C33 C 0.0679(3) 0.6310(3) 0.7698(2) 0.0386 1.0000 Uani . . . . . . 
C34 C 0.0319(3) 0.7719(3) 0.7916(3) 0.0421 1.0000 Uani . . . . . . 
C35 C 0.1385(3) 0.8912(3) 0.7873(3) 0.0423 1.0000 Uani . . . . . . 
C36 C 0.2828(3) 0.8689(3) 0.7604(2) 0.0363 1.0000 Uani . . . . . . 
H21 H 0.1439(2) 0.3618(3) 0.43657(19) 0.0438 1.0000 Uiso R . . . . . 
H31 H -0.0214(4) 0.1865(4) 0.5019(3) 0.0562 1.0000 Uiso R . . . . . 
H41 H 0.1596(4) 0.1167(3) 0.6369(3) 0.0595 1.0000 Uiso R . . . . . 
H51 H 0.4338(3) 0.2658(3) 0.6481(2) 0.0429 1.0000 Uiso R . . . . . 
H121 H 0.7290(3) 0.5387(3) 0.7752(2) 0.0410 1.0000 Uiso R . . . . . 
H131 H 0.8271(3) 0.5239(3) 0.9619(2) 0.0532 1.0000 Uiso R . . . . . 
H141 H 0.7255(3) 0.6379(3) 1.1445(2) 0.0484 1.0000 Uiso R . . . . . 
H151 H 0.5264(3) 0.7680(3) 1.1420(2) 0.0443 1.0000 Uiso R . . . . . 
H161 H 0.4324(3) 0.7908(3) 0.9585(2) 0.0412 1.0000 Uiso R . . . . . 
H221 H 0.5230(3) 0.8898(3) 0.5813(2) 0.0389 1.0000 Uiso R . . . . . 
H231 H 0.6787(3) 1.1342(3) 0.6130(3) 0.0528 1.0000 Uiso R . . . . . 
H241 H 0.8729(3) 1.2739(3) 0.7930(3) 0.0521 1.0000 Uiso R . . . . . 
H251 H 0.9030(3) 1.1769(3) 0.9458(3) 0.0453 1.0000 Uiso R . . . . . 
H261 H 0.7478(3) 0.9325(3) 0.9161(2) 0.0365 1.0000 Uiso R . . . . . 
H321 H 0.2362(3) 0.5081(3) 0.7295(2) 0.0372 1.0000 Uiso R . . . . . 
H331 H -0.0095(3) 0.5444(3) 0.7725(2) 0.0444 1.0000 Uiso R . . . . . 
H341 H -0.0714(3) 0.7873(3) 0.8105(3) 0.0518 1.0000 Uiso R . . . . . 
H351 H 0.1129(3) 0.9932(3) 0.8034(3) 0.0534 1.0000 Uiso R . . . . . 
H361 H 0.3597(3) 0.9552(3) 0.7569(2) 0.0447 1.0000 Uiso R . . . . . 

loop_
_atom_site_aniso_label
_atom_site_aniso_U_11
_atom_site_aniso_U_22
_atom_site_aniso_U_33
_atom_site_aniso_U_23
_atom_site_aniso_U_13
_atom_site_aniso_U_12
Ru1 0.02727(14) 0.02086(12) 0.01907(12) 0.00968(9) 0.00268(9) 0.00499(9) 
Cl1 0.0366(3) 0.0296(3) 0.0248(3) 0.0122(2) 0.0022(2) 0.0128(2) 
P1 0.0281(3) 0.0201(3) 0.0185(3) 0.0079(2) 0.0037(2) 0.0056(2) 
N1 0.0323(10) 0.0239(9) 0.0223(9) 0.0086(7) 0.0036(7) 0.0027(7) 
N2 0.0333(11) 0.0468(12) 0.0294(10) 0.0149(9) 0.0008(8) -0.0005(9) 
C3 0.0490(16) 0.0532(17) 0.0382(15) 0.0104(13) 0.0100(12) -0.0159(13) 
C4 0.081(2) 0.0331(13) 0.0347(14) 0.0143(11) 0.0213(14) -0.0064(13) 
C5 0.0564(15) 0.0270(11) 0.0238(11) 0.0127(9) 0.0095(10) 0.0090(10) 
C11 0.0311(11) 0.0240(10) 0.0192(10) 0.0095(8) 0.0030(8) 0.0025(8) 
C12 0.0406(13) 0.0385(12) 0.0236(11) 0.0116(9) 0.0051(9) 0.0143(10) 
C13 0.0560(17) 0.0459(15) 0.0311(13) 0.0168(11) 0.0005(11) 0.0219(13) 
C14 0.0601(17) 0.0380(13) 0.0228(11) 0.0146(10) -0.0025(11) 0.0061(12) 
C15 0.0514(15) 0.0378(13) 0.0215(11) 0.0092(10) 0.0071(10) 0.0040(11) 
C16 0.0409(13) 0.0352(12) 0.0269(11) 0.0119(10) 0.0068(10) 0.0101(10) 
C21 0.0309(11) 0.0207(9) 0.0268(10) 0.0087(8) 0.0086(8) 0.0071(8) 
C22 0.0416(13) 0.0263(11) 0.0293(11) 0.0117(9) 0.0099(10) 0.0109(9) 
C23 0.0595(17) 0.0285(12) 0.0440(14) 0.0199(11) 0.0190(12) 0.0145(11) 
C24 0.0561(17) 0.0210(11) 0.0531(16) 0.0107(11) 0.0182(13) 0.0002(11) 
C25 0.0431(14) 0.0305(12) 0.0397(14) 0.0076(10) 0.0037(11) -0.0018(10) 
C26 0.0364(12) 0.0258(11) 0.0290(11) 0.0087(9) 0.0046(9) 0.0051(9) 
C31 0.0293(11) 0.0286(11) 0.0212(10) 0.0083(8) 0.0040(8) 0.0083(9) 
C32 0.0355(12) 0.0298(11) 0.0276(11) 0.0085(9) 0.0081(9) 0.0091(9) 
C33 0.0332(12) 0.0427(14) 0.0352(13) 0.0122(11) 0.0078(10) 0.0059(10) 
C34 0.0340(13) 0.0552(16) 0.0404(14) 0.0185(12) 0.0109(11) 0.0193(12) 
C35 0.0436(14) 0.0422(14) 0.0478(15) 0.0199(12) 0.0123(12) 0.0215(12) 
C36 0.0404(13) 0.0325(12) 0.0388(13) 0.0148(10) 0.0105(10) 0.0137(10) 

_refine_ls_extinction_method 
    'None'
loop_
 _geom_bond_atom_site_label_1
 _geom_bond_site_symmetry_1
 _geom_bond_atom_site_label_2
 _geom_bond_site_symmetry_2
 _geom_bond_distance
 _geom_bond_publ_flag
Ru1 . Cl1 . 2.4313(5)    yes
Ru1 . P1 . 2.4276(5)    yes
Ru1 . N1 . 2.0836(18)    yes
Ru1 . Cl1 2_666 2.4313(5)    yes
Ru1 . N1 2_666 2.0836(18)    yes
Ru1 . P1 2_666 2.4276(5)    yes
P1 . C11 . 1.849(2)    yes
P1 . C21 . 1.839(2)    yes
P1 . C31 . 1.839(2)    yes
N1 . N2 . 1.344(3)    yes
N1 . C5 . 1.339(3)    yes
N2 . C3 . 1.352(3)    yes
N2 . H21 . 0.900    no
C3 . C4 . 1.350(5)    yes
C3 . H31 . 1.000    no
C4 . C5 . 1.410(4)    yes
C4 . H41 . 1.000    no
C5 . H51 . 1.000    no
C11 . C12 . 1.386(3)    yes
C11 . C16 . 1.397(3)    yes
C12 . C13 . 1.394(3)    yes
C12 . H121 . 1.000    no
C13 . C14 . 1.376(4)    yes
C13 . H131 . 1.000    no
C14 . C15 . 1.374(4)    yes
C14 . H141 . 1.000    no
C15 . C16 . 1.387(3)    yes
C15 . H151 . 1.000    no
C16 . H161 . 1.000    no
C21 . C22 . 1.403(3)    yes
C21 . C26 . 1.395(3)    yes
C22 . C23 . 1.387(3)    yes
C22 . H221 . 1.000    no
C23 . C24 . 1.385(4)    yes
C23 . H231 . 1.000    no
C24 . C25 . 1.373(4)    yes
C24 . H241 . 1.000    no
C25 . C26 . 1.394(3)    yes
C25 . H251 . 1.000    no
C26 . H261 . 1.000    no
C31 . C32 . 1.394(3)    yes
C31 . C36 . 1.385(3)    yes
C32 . C33 . 1.382(3)    yes
C32 . H321 . 1.000    no
C33 . C34 . 1.385(4)    yes
C33 . H331 . 1.000    no
C34 . C35 . 1.381(4)    yes
C34 . H341 . 1.000    no
C35 . C36 . 1.401(4)    yes
C35 . H351 . 1.000    no
C36 . H361 . 1.000    no
loop_
 _geom_angle_atom_site_label_1
 _geom_angle_site_symmetry_1
 _geom_angle_atom_site_label_2
 _geom_angle_site_symmetry_2
 _geom_angle_atom_site_label_3
 _geom_angle_site_symmetry_3
 _geom_angle
 _geom_angle_publ_flag
Cl1 . Ru1 . P1 . 96.540(17)    yes
Cl1 . Ru1 . N1 . 91.14(5)    yes
P1 . Ru1 . N1 . 87.62(5)    yes
Cl1 2_666 Ru1 . Cl1 . 180.0    yes
N1 2_666 Ru1 . Cl1 . 88.86(5)    yes
P1 2_666 Ru1 . Cl1 . 83.460(17)    yes
N1 2_666 Ru1 . P1 . 92.38(5)    yes
P1 2_666 Ru1 . P1 . 180.0    yes
N1 2_666 Ru1 . N1 . 180.0    yes
Ru1 . P1 . C11 . 123.45(7)    yes
Ru1 . P1 . C21 . 114.42(7)    yes
C11 . P1 . C21 . 101.29(10)    yes
Ru1 . P1 . C31 . 113.23(7)    yes
C11 . P1 . C31 . 98.90(10)    yes
C21 . P1 . C31 . 102.58(10)    yes
Ru1 . N1 . N2 . 122.79(15)    yes
Ru1 . N1 . C5 . 131.36(17)    yes
N2 . N1 . C5 . 105.8(2)    yes
N1 . N2 . C3 . 111.8(2)    yes
N1 . N2 . H21 . 124.106    no
C3 . N2 . H21 . 124.110    no
N2 . C3 . C4 . 106.8(3)    yes
N2 . C3 . H31 . 126.621    no
C4 . C3 . H31 . 126.629    no
C3 . C4 . C5 . 106.4(2)    yes
C3 . C4 . H41 . 126.794    no
C5 . C4 . H41 . 126.778    no
C4 . C5 . N1 . 109.2(2)    yes
C4 . C5 . H51 . 125.407    no
N1 . C5 . H51 . 125.399    no
P1 . C11 . C12 . 120.08(16)    yes
P1 . C11 . C16 . 121.31(17)    yes
C12 . C11 . C16 . 118.5(2)    yes
C11 . C12 . C13 . 120.5(2)    yes
C11 . C12 . H121 . 119.750    no
C13 . C12 . H121 . 119.745    no
C12 . C13 . C14 . 120.3(2)    yes
C12 . C13 . H131 . 119.858    no
C14 . C13 . H131 . 119.849    no
C13 . C14 . C15 . 119.8(2)    yes
C13 . C14 . H141 . 120.079    no
C15 . C14 . H141 . 120.073    no
C14 . C15 . C16 . 120.3(2)    yes
C14 . C15 . H151 . 119.835    no
C16 . C15 . H151 . 119.839    no
C11 . C16 . C15 . 120.5(2)    yes
C11 . C16 . H161 . 119.736    no
C15 . C16 . H161 . 119.722    no
P1 . C21 . C22 . 118.07(17)    yes
P1 . C21 . C26 . 123.56(17)    yes
C22 . C21 . C26 . 118.4(2)    yes
C21 . C22 . C23 . 120.7(2)    yes
C21 . C22 . H221 . 119.655    no
C23 . C22 . H221 . 119.652    no
C22 . C23 . C24 . 119.9(2)    yes
C22 . C23 . H231 . 120.061    no
C24 . C23 . H231 . 120.059    no
C23 . C24 . C25 . 120.2(2)    yes
C23 . C24 . H241 . 119.877    no
C25 . C24 . H241 . 119.877    no
C24 . C25 . C26 . 120.3(2)    yes
C24 . C25 . H251 . 119.848    no
C26 . C25 . H251 . 119.854    no
C21 . C26 . C25 . 120.4(2)    yes
C21 . C26 . H261 . 119.778    no
C25 . C26 . H261 . 119.773    no
P1 . C31 . C32 . 117.75(17)    yes
P1 . C31 . C36 . 123.61(18)    yes
C32 . C31 . C36 . 118.6(2)    yes
C31 . C32 . C33 . 121.0(2)    yes
C31 . C32 . H321 . 119.517    no
C33 . C32 . H321 . 119.527    no
C32 . C33 . C34 . 120.1(2)    yes
C32 . C33 . H331 . 119.977    no
C34 . C33 . H331 . 119.955    no
C33 . C34 . C35 . 119.9(2)    yes
C33 . C34 . H341 . 120.041    no
C35 . C34 . H341 . 120.016    no
C34 . C35 . C36 . 119.8(2)    yes
C34 . C35 . H351 . 120.107    no
C36 . C35 . H351 . 120.104    no
C35 . C36 . C31 . 120.6(2)    yes
C35 . C36 . H361 . 119.683    no
C31 . C36 . H361 . 119.676    no

#------------------------------------------------------------------------------
loop_
_geom_contact_atom_site_label_1
_geom_contact_atom_site_label_2
_geom_contact_distance
_geom_contact_site_symmetry_1
_geom_contact_site_symmetry_2
_geom_contact_publ_flag
 N2        C34       3.372(4)   . 2_566 no
 C12       C34       3.571(4)   . 1_655 no
 C13       C15       3.555(4)   . 2_667 no
 C14       C15       3.504(3)   . 2_667 no
 C15       C36       3.587(3)   . 2_677 no
 C26       C34       3.552(4)   . 1_655 no
#------------------------------------------------------------------------------
loop_
_geom_torsion_atom_site_label_1
_geom_torsion_atom_site_label_2
_geom_torsion_atom_site_label_3
_geom_torsion_atom_site_label_4
_geom_torsion_site_symmetry_1
_geom_torsion_site_symmetry_2
_geom_torsion_site_symmetry_3
_geom_torsion_site_symmetry_4
_geom_torsion
_geom_torsion_publ_flag
 Ru1 P1 C11 C12 . . . . 34.0(2) no
 Ru1 P1 C11 C16 . . . . -150.5(1) no
 Ru1 P1 C21 C22 . . . . 46.9(2) no
 Ru1 P1 C21 C26 . . . . -131.9(2) no
 Ru1 P1 C31 C32 . . . . 68.5(2) no
 Ru1 P1 C31 C36 . . . . -113.8(2) no
 Ru1 P1 C21 C22 . 2_666 2_666 2_666 -46.9(2) no
 Ru1 P1 C21 C26 . 2_666 2_666 2_666 131.9(2) no
 Ru1 P1 C31 C32 . 2_666 2_666 2_666 -68.5(2) no
 Ru1 P1 C31 C36 . 2_666 2_666 2_666 113.8(2) no
 Ru1 N1 N2 C3 . . . . -178.6(2) no
 Ru1 N1 C5 C4 . . . . 179.0(2) no
 Ru1 N1 N2 C3 . 2_666 2_666 2_666 178.6(2) no
 Ru1 N1 C5 C4 . 2_666 2_666 2_666 -179.0(2) no
 Cl1 Ru1 P1 C11 . . . . -25.48(7) no
 Cl1 Ru1 P1 C21 . . . . 98.43(8) no
 Cl1 Ru1 P1 C31 . . . . -144.5(1) no
 Cl1 Ru1 P1 C11 . . 2_666 2_666 -154.52(7) no
 Cl1 Ru1 P1 C21 . . 2_666 2_666 81.57(8) no
 Cl1 Ru1 P1 C31 . . 2_666 2_666 -35.5(1) no
 Cl1 Ru1 N1 N2 . . . . -159.8(2) no
 Cl1 Ru1 N1 C5 . . . . 21.2(2) no
 Cl1 Ru1 N1 N2 . . 2_666 2_666 -20.2(2) no
 Cl1 Ru1 N1 C5 . . 2_666 2_666 158.8(2) no
 P1 Ru1 N1 N2 . . . . 103.7(2) no
 P1 Ru1 N1 C5 . . . . -75.3(2) no
 P1 Ru1 N1 N2 . . 2_666 2_666 76.3(2) no
 P1 Ru1 N1 C5 . . 2_666 2_666 -104.7(2) no
 P1 C11 C12 C13 . . . . 175.2(2) no
 P1 C11 C16 C15 . . . . -176.2(2) no
 P1 C21 C22 C23 . . . . -176.3(2) no
 P1 C21 C26 C25 . . . . 176.2(2) no
 P1 C31 C32 C33 . . . . 178.3(2) no
 P1 C31 C36 C35 . . . . -177.7(2) no
 N1 Ru1 P1 C11 . . . . 65.40(9) no
 N1 Ru1 P1 C21 . . . . -170.7(1) no
 N1 Ru1 P1 C31 . . . . -53.6(1) no
 N1 Ru1 P1 C11 . . 2_666 2_666 114.60(9) no
 N1 Ru1 P1 C21 . . 2_666 2_666 -9.3(1) no
 N1 Ru1 P1 C31 . . 2_666 2_666 -126.4(1) no
 N1 N2 C3 C4 . . . . -0.8(3) no
 N1 C5 C4 C3 . . . . -0.3(3) no
 N2 N1 C5 C4 . . . . -0.2(2) no
 N2 C3 C4 C5 . . . . 0.7(3) no
 C3 N2 N1 C5 . . . . 0.7(3) no
 C11 P1 C21 C22 . . . . -178.1(2) no
 C11 P1 C21 C26 . . . . 3.2(2) no
 C11 P1 C31 C32 . . . . -63.9(2) no
 C11 P1 C31 C36 . . . . 113.8(2) no
 C11 C12 C13 C14 . . . . 0.8(4) no
 C11 C16 C15 C14 . . . . 1.2(4) no
 C12 C11 P1 C21 . . . . -95.6(2) no
 C12 C11 P1 C31 . . . . 159.6(2) no
 C12 C11 C16 C15 . . . . -0.6(3) no
 C12 C13 C14 C15 . . . . -0.2(4) no
 C13 C12 C11 C16 . . . . -0.5(3) no
 C13 C14 C15 C16 . . . . -0.8(4) no
 C16 C11 P1 C21 . . . . 79.9(2) no
 C16 C11 P1 C31 . . . . -24.9(2) no
 C21 P1 C31 C32 . . . . -167.6(2) no
 C21 P1 C31 C36 . . . . 10.0(2) no
 C21 C22 C23 C24 . . . . -0.3(4) no
 C21 C26 C25 C24 . . . . 0.5(4) no
 C22 C21 P1 C31 . . . . -76.2(2) no
 C22 C21 C26 C25 . . . . -2.5(4) no
 C22 C23 C24 C25 . . . . -1.9(4) no
 C23 C22 C21 C26 . . . . 2.5(4) no
 C23 C24 C25 C26 . . . . 1.8(4) no
 C26 C21 P1 C31 . . . . 105.1(2) no
 C31 C32 C33 C34 . . . . -0.6(4) no
 C31 C36 C35 C34 . . . . -0.3(4) no
 C32 C31 C36 C35 . . . . -0.0(3) no
 C32 C33 C34 C35 . . . . 0.2(4) no
 C33 C32 C31 C36 . . . . 0.5(3) no
 C33 C34 C35 C36 . . . . 0.2(5) no
#------------------------------------------------------------------------------

#===END
